# Supplementary material for: Fenarimol, a Pyrimidine-Type Fungicide, Inhibits Brassinosteroid Biosynthesis
Source: PubMed Central journal article supplement (PMC4581192; doi:10.3390/ijms160817273), 2015-07-29
Supplement: ijms-16-17273-s001.pdf [file ijms-16-17273-s001.pdf]

# Supplementary Information

**Table S1.** Primers used in quantitative RT-PCR.

| <b>Genes</b>                   | <b>Forward Primer</b>        | <b>Reverse Primer</b>          |
|--------------------------------|------------------------------|--------------------------------|
| <i>ACT2</i><br>(AT3G18780)     | CGCCATCCAAGCTGTTCTC          | TCACGTCCAGCAAGGTCAAG           |
| <i>UBQ2</i><br>(AT2G36170)     | CCAAGATCCAGGACAAAGAAGGA      | TGGAGACGAGCATAAACTTGC          |
| <i>SAUR-AC1</i><br>(AT4G38850) | GAGATATGTGGTGCCGGTTT         | GTATTGTTAAGCCGCCATT            |
| <i>TCH4</i><br>(AT5G57560)     | CGAGTCTTTGGAACGCTGAT         | CTTCTTGTTGAAAGCCACGG           |
| <i>IAA19</i><br>(AT3G15540)    | GAAGGACTCGGGCTTGAGAT         | GACGCCGCTTTCACATTG             |
| <i>BSS1</i><br>(AT3G57130)     | CATGACCTAACCTCGACTTT         | CCCATCACCATTAGCTTC             |
| <i>DWF4</i><br>(AT3G50660)     | CATAAAGCTCTCTTCAGTCACGA      | CGTCTGTTCTTTGTTTCCTAA          |
| <i>BR6ox2</i><br>(AT3G30180)   | GGAGGTGGAGTTAGGCTTTGCC       | TCTTCTCCATTCTCTCCCATCTAT       |
| <i>ROT3</i><br>(AT4G36380)     | GGTGGTGGGCAAAGGCTAT          | GTCTTCCTCAGCCGTCCAAC           |
| <i>rbcL</i><br>(ATCG00490)     | TACTGGTACATGGACAACCTG        | GGTCTAAGGGATAAGCTACA           |
| <i>LHCP</i><br>(AT1G50900)     | ATCCGACCGAGTCAAGTACT         | GGTTCCTTGCGAATGTCT             |
| <i>rbcS</i><br>(AT1G67090)     | GCACCGACTCCGCTCA             | TGGACTTGACGGGTGTTGTC           |
| <i>psbA</i><br>(ATCG00020)     | CTATACAACGGCGGTCCTC          | GCATACCCAGACGGAAACTA           |
| <i>CHLH</i><br>(AT5G13630)     | TGGTAGAGAGACAGAAGCTCGAAA     | CCAAAGAACCTGCCCAAGAG           |
| <i>HEMA1</i><br>(AT1G58290)    | GTGAGCTCTCTGCTTCTTCTGATTCTG  | CTGCTTCTTTCCTTTGTATATCGATCAGCT |
| <i>CAO</i><br>(AT1G44446)      | CCGGTGGAACACGGTTTACTTCTAGATA | AGTATCCTTGGAGACCCGAGGTAGGTGT   |
| <i>GUN4</i><br>(AT3G59400)     | GAAACCGCGACCATATTCGAC        | CGGCTTCTCCGGATATCTGAA          |
| <i>BPG3</i><br>(AT2G40400)     | TCCAAATCCAAACGTCGTC          | CGGTGGTGCGACGAGAAT             |

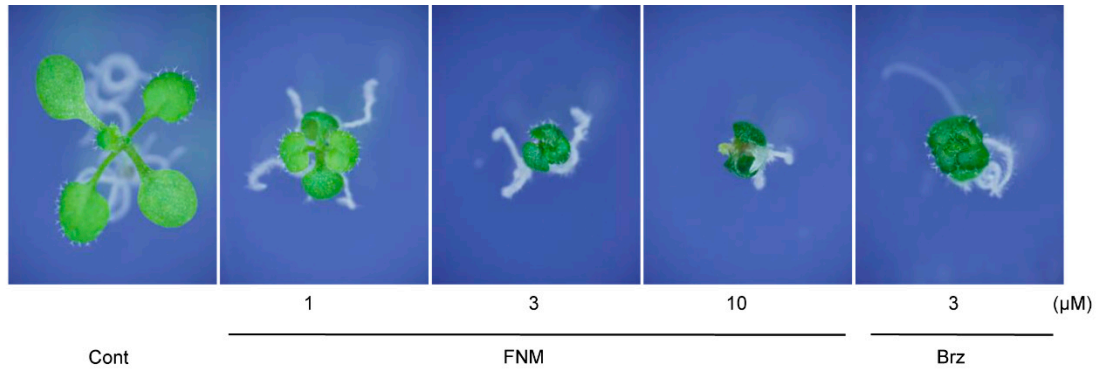

**Figure S1.** Responses of *Arabidopsis* seedlings to FM treatments and brassinazole (brz). Wild-type (Col-0) plants grown on  $\frac{1}{2}$  MS media containing designed chemicals in the light for 12 days. The plants shown are as follows: The plant without chemical treatment (the left plant); plant grown in 1  $\mu$ M FM (the second left plant); plant treated with 3  $\mu$ M FM (the third left plant); 10  $\mu$ M FM (the second right plant) and plant treated with 3  $\mu$ M brz (the third left plant). All of the experiments were duplicated to establish repeatability.
